# Supplementary material
Source: MDPI journal article supplement (https://www.mdpi.com/2227-7390/12/5/725)
Supplement: s1 [file s1]

**Table S1:** The table presents topological descriptors and their corresponding values for both control and disease groups, along with the differences, p-values, and adjusted p-values for each descriptor in the analysis of the entire gene expression dataset.

| Descriptors    | Dataset       |               | Difference<br>(disease - control) | p.value | adj.p.value |
|----------------|---------------|---------------|-----------------------------------|---------|-------------|
|                | Disease class | Control class |                                   |         |             |
| Classical EC   | 14.0000       | 14.0000       | 0.0000                            | 0.78700 | 0.90600     |
| Persistence EC | 0.6252        | 0.3509        | 0.2743                            | 0.00000 | 0.00000     |
| Sum P-0        | 0.6305        | 0.3573        | 0.2732                            | 0.00000 | 0.00000     |
| Average P-0    | 0.0371        | 0.0210        | 0.0161                            | 0.00000 | 0.00000     |
| Max P-0        | 0.0732        | 0.0266        | 0.0466                            | 0.04660 | 0.18089     |
| Range P-0      | 0.0475        | 0.0089        | 0.0386                            | 0.15000 | 0.27133     |
| Sum P-1        | 0.0052        | 0.0072        | -0.0020                           | 0.60000 | 0.80882     |
| Average P-1    | 0.0017        | 0.0014        | 0.0003                            | 0.82400 | 0.90600     |
| Max P-1        | 0.0022        | 0.0025        | -0.0003                           | 0.89700 | 0.90600     |
| Range P-1      | 0.0010        | 0.0020        | -0.0010                           | 0.62500 | 0.80882     |
| Sum BT-1       | 0.1221        | 0.1292        | -0.0071                           | 0.90600 | 0.90600     |
| Average BT-1   | 0.0400        | 0.0258        | 0.0149                            | 0.18500 | 0.27133     |
| Sum DT-1       | 0.1274        | 0.1364        | -0.0090                           | 0.89100 | 0.90600     |
| Average DT-1   | 0.0425        | 0.0273        | 0.0152                            | 0.18500 | 0.27133     |
| Sum P-2        | 0.0000        | 0.0008        | -0.0008                           | 0.04600 | 0.14457     |
| Average P-2    | 0.0000        | 0.0004        | -0.0004                           | 0.09800 | 0.21560     |
| Max P-2        | 0.0000        | 0.0006        | -0.0006                           | 0.06600 | 0.18089     |
| Range P-2      | 0.0000        | 0.0003        | -0.0003                           | 0.00800 | 0.03667     |
| Sum BT-2       | 0.0000        | 0.0569        | -0.0569                           | 0.01000 | 0.03667     |
| Average BT-2   | 0.0000        | 0.0284        | -0.0284                           | 0.17400 | 0.27133     |
| Sum DT-2       | 0.0000        | 0.0577        | -0.0577                           | 0.01000 | 0.03667     |
| Average DT-2   | 0.0000        | 0.0289        | -0.0289                           | 0.17400 | 0.27133     |

**Note:** In the table, we use the following abbreviations: Classical EC for Classical Euler characteristic, Persistence EC for persistence-wise Euler characteristic, Sum P- $k$  for the sum of persistence of  $k$ -dimensional features, Average P- $k$  for average persistence of  $k$ -dimensional features, Max P- $k$  for maximum persistence of  $k$ -dimensional features, Range P- $k$  for range of persistence of  $k$ -dimensional features, Sum BT- $k$  for sum of birth times of  $k$ -dimensional features, Average BT- $k$  for average birth times of  $k$ -dimensional features, Sum DT- $k$  for sum of death times of  $k$ -dimensional features, and Average DT- $k$  for average death times of  $k$ -dimensional features.
