# Supplementary material
Source: MDPI journal article supplement (https://www.mdpi.com/2227-7390/12/5/725)

**Figure S1:** KDE plots for all the 24 topological descriptors considered in the paper between the control and samples classes, based on 2,000 permutations. Red vertical dotted lines represent each descriptor's actual difference.

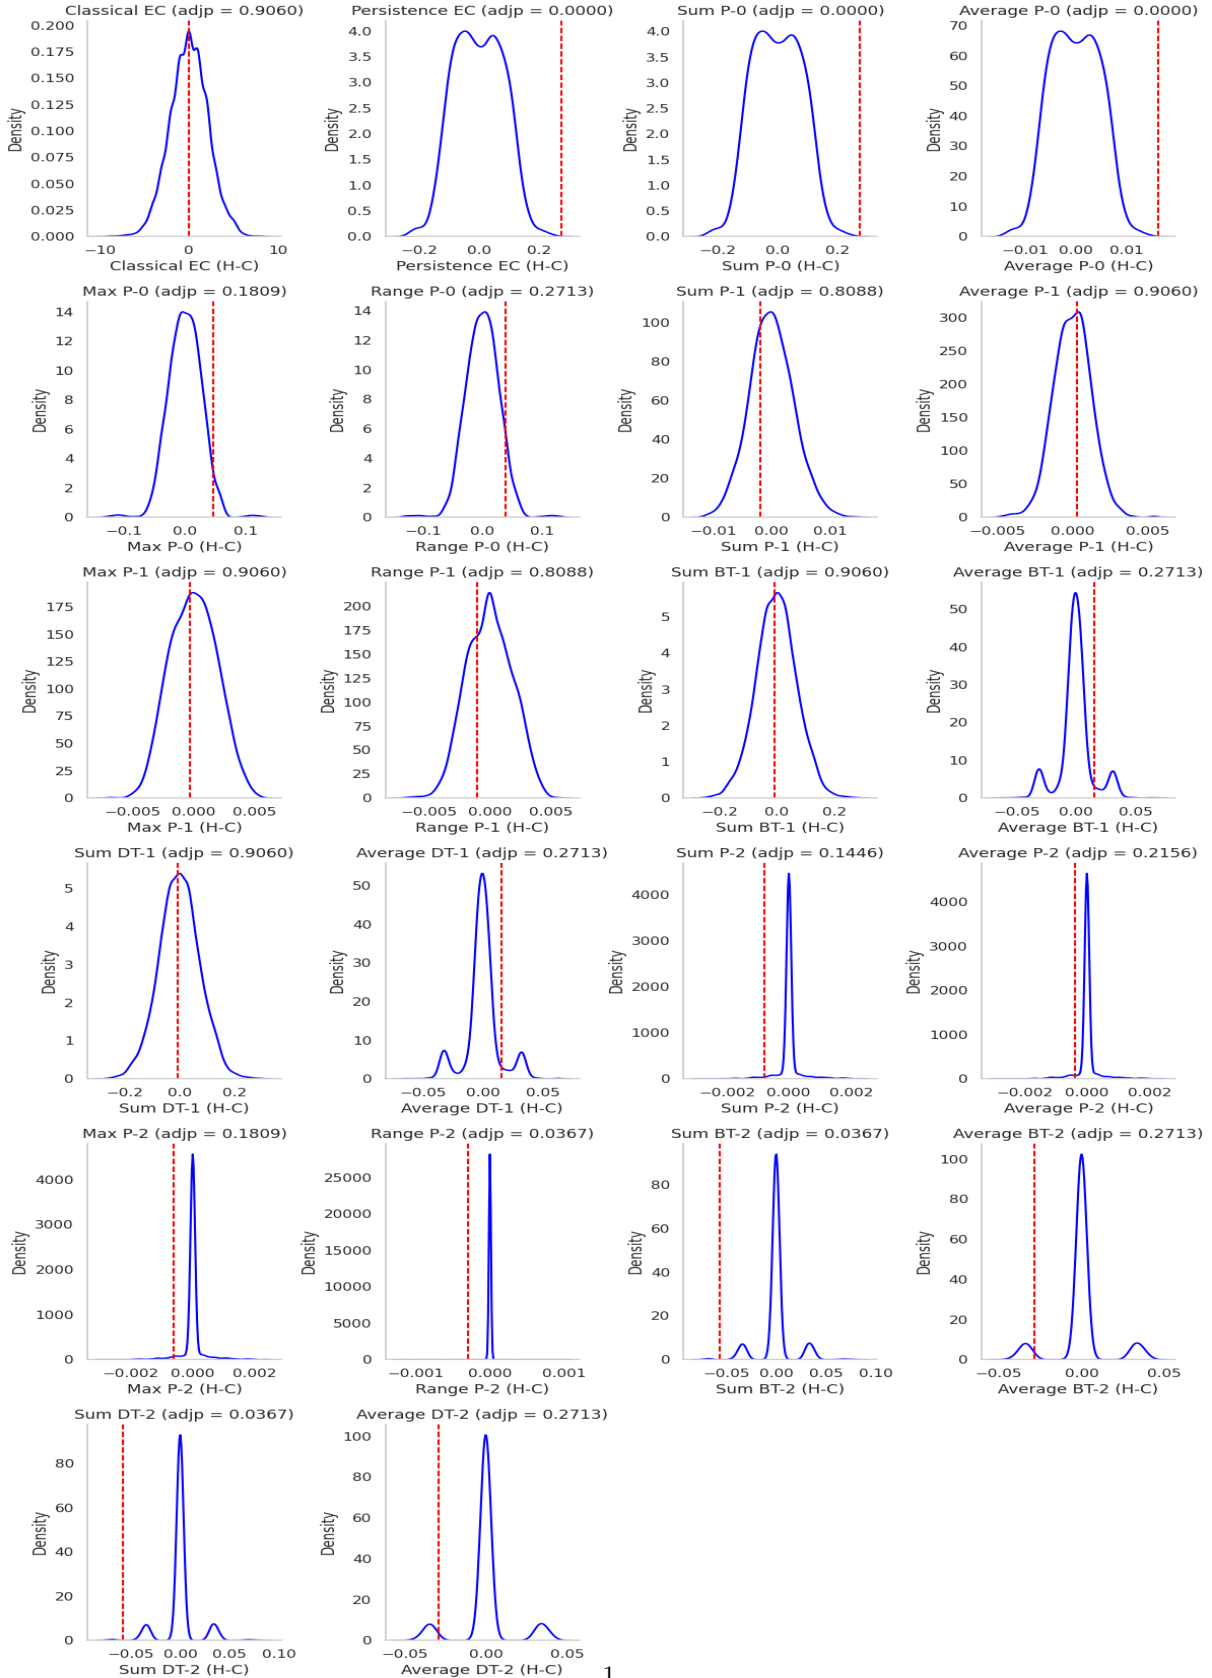

Supplement: s1 [file s1]
