# Supplementary material
Source: MDPI journal article supplement (https://www.mdpi.com/2227-7390/12/5/725)
Supplement: s1 [file s1]

**Table S2:** Significant pathways from classical enrichment-based pathway analysis method (hypergeometric enrichment test)

| Pathway ID                              | DE Genes of Total Genes | p.value       | adj. p.value |
|-----------------------------------------|-------------------------|---------------|--------------|
| Complement and coagulation cascades     | 18 of 64                | 4.161645 e-09 | 1.0000 e-06  |
| Hematopoietic cell lineage              | 18 of 91                | 1.373304 e-06 | 1.7200 e-04  |
| Cholesterol metabolism                  | 11 of 37                | 2.395551 e-06 | 2.0000 e-04  |
| Neutrophil extracellular trap formation | 24 of 165               | 8.412235 e-06 | 5.2800 e-04  |
| Osteoclast differentiation              | 20 of 125               | 1.113291 e-05 | 5.5900 e-04  |
| ECM-receptor interaction                | 14 of 71                | 2.082788 e-05 | 7.9000 e-04  |
| Platelet activation                     | 18 of 110               | 2.204351 e-05 | 7.9000 e-04  |
| Cytokine-cytokine receptor interaction  | 26 of 210               | 6.397349 e-05 | 2.0070 e-03  |
| PPAR signaling pathway                  | 11 of 57                | 1.925433 e-04 | 5.3700 e-03  |
| IL-17 signaling pathway                 | 13 of 78                | 2.448530 e-04 | 6.1460 e-03  |
| Neuroactive ligand-receptor interaction | 23 of 197               | 3.901925 e-04 | 8.2720 e-03  |
| Phagosome                               | 18 of 137               | 3.954733 e-04 | 8.2720 e-03  |
| Glycerolipid metabolism                 | 9 of 50                 | 1.226986 e-03 | 2.3291 e-02  |
| JAK-STAT signaling pathway              | 16 of 128               | 1.391876 e-03 | 2.3291 e-02  |
| Fat digestion and absorption            | 6 of 24                 | 1.377990 e-03 | 2.3291 e-02  |
| Calcium signaling pathway               | 20 of 185               | 2.310244 e-03 | 3.6242 e-02  |
